# Supplementary material
Source: Springer Nature journal article supplement (https://www.springermedizin.de/resource/supplementary/13063_2011_1101_MOESM1_ESM.pdf/9619650)

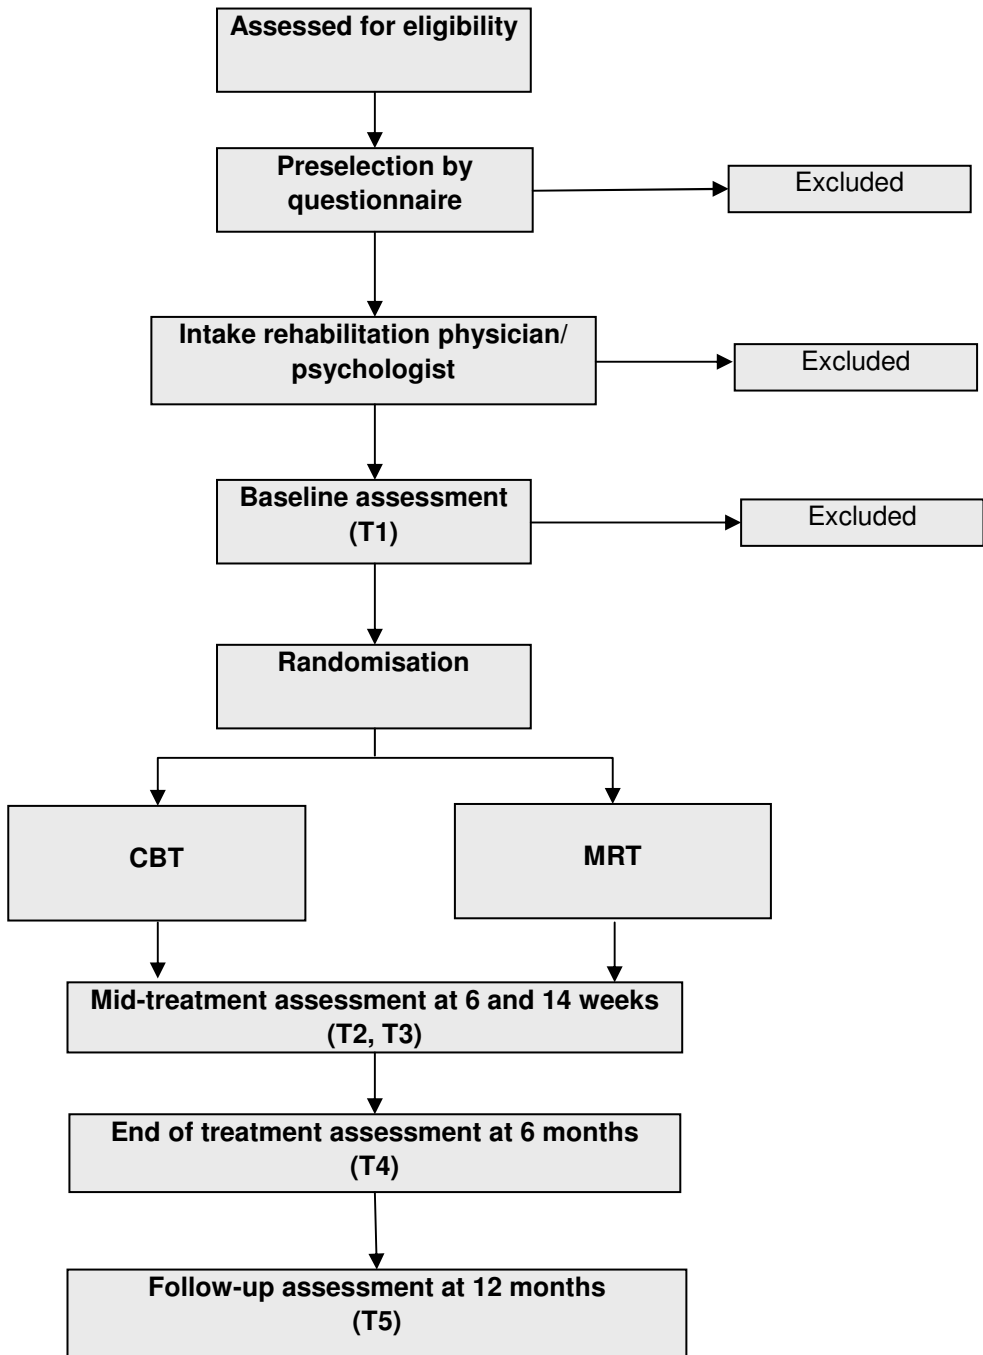

Supplement: MOESM1 [file 9619650]
